# Supplementary material for: Laboratory, Clinical-Related Processing and Time-Related Factors’ Effect on Properties of High Translucent Zirconium Dioxide Ceramics Intended for Monolithic Restorations A Systematic Review
Source: MDPI journal article supplement (doi:10.3390/ceramics6010045), 2023-03-16
Supplement: s1 [file s1]

## Supplements

**Table S1.** Search strategies for each database.

|                                    | PubMed                                                                                                                                                                                                                                                                                                                                                                                                                                                                                                                                                                                               | Cochrane Library                                                                                                                                                                                                                                                                                                                                                                                                                                                                                                                                                                                                                                                                                                                                                                                                                                                                                                                                                                                                   | Scopus                                                                                                                                                                                                                                                                                                                                                                                                                                                                           | Web of Science                                                                                                                                                                                                                                                                                                                                                                                                                                       |
|------------------------------------|------------------------------------------------------------------------------------------------------------------------------------------------------------------------------------------------------------------------------------------------------------------------------------------------------------------------------------------------------------------------------------------------------------------------------------------------------------------------------------------------------------------------------------------------------------------------------------------------------|--------------------------------------------------------------------------------------------------------------------------------------------------------------------------------------------------------------------------------------------------------------------------------------------------------------------------------------------------------------------------------------------------------------------------------------------------------------------------------------------------------------------------------------------------------------------------------------------------------------------------------------------------------------------------------------------------------------------------------------------------------------------------------------------------------------------------------------------------------------------------------------------------------------------------------------------------------------------------------------------------------------------|----------------------------------------------------------------------------------------------------------------------------------------------------------------------------------------------------------------------------------------------------------------------------------------------------------------------------------------------------------------------------------------------------------------------------------------------------------------------------------|------------------------------------------------------------------------------------------------------------------------------------------------------------------------------------------------------------------------------------------------------------------------------------------------------------------------------------------------------------------------------------------------------------------------------------------------------|
| <b>Search terms, combinations</b>  | ("Zirconium"[Mesh] OR zirconium OR zirconia OR zirconium dioxide OR Y-TZP) AND (translucent OR "monolithic" OR "full anatomical" OR "full contour" OR cubic OR multilayer OR FSZ OR 4Y-TZP OR 5Y-TZP) AND ("computer aided manufacturing" OR milling OR "CAD CAM" OR sintering OR heat OR "Heating"[Mesh] OR heating OR firing OR staining OR infiltrating OR "Color"[Mesh] OR color OR shade OR sandblasting OR airborne-particle abrasion OR glazing OR polishing OR grinding OR aging OR fatigue OR thermocycling OR thermal cycling OR LTD OR "low temperature degradation" OR wear OR abrasion) | ([mh Zirconium] OR (zirconium):ti,ab,kw OR (zirconia):ti,ab,kw OR (zirconium dioxide):ti,ab,kw OR (Y-TZP):ti,ab,kw) AND ((translucent):ti,ab,kw OR ("monolithic"):ti,ab,kw OR ("full anatomical"):ti,ab,kw OR ("full contour"):ti,ab,kw OR (cubic):ti,ab,kw OR (multilayer):ti,ab,kw OR (fsz):ti,ab,kw OR (4y-tzp):ti,ab,kw OR (5y-tzp):ti,ab,kw) AND (("computer aided manufacturing"):ti,ab,kw OR (milling):ti,ab,kw OR ("CAD CAM"):ti,ab,kw OR (sintering):ti,ab,kw OR (heat):ti,ab,kw OR [mh Heating] OR (heating):ti,ab,kw OR (firing):ti,ab,kw OR (staining):ti,ab,kw OR (infiltrating):ti,ab,kw OR [mh Color] OR (col*r):ti,ab,kw OR (shade):ti,ab,kw OR (sandblasting):ti,ab,kw OR (airborne-particle abrasion):ti,ab,kw OR (glazing):ti,ab,kw OR (polishing):ti,ab,kw OR (grinding):ti,ab,kw OR (aging):ti,ab,kw OR (fatigue):ti,ab,kw OR (thermocycling):ti,ab,kw OR (thermal cycling):ti,ab,kw OR (LTD):ti,ab,kw OR ("low temperature degradation"):ti,ab,kw OR (wear):ti,ab,kw OR (abrasion):ti,ab,kw) | TITLE-ABS-KEY(zirconia OR "zirconium dioxide" OR y-tzp) AND TITLE-ABS-KEY(translucent OR "monolithic" OR "full anatomical" OR "full contour" OR cubic OR fsz OR 4y-tzp OR 5y-tzp) AND TITLE-ABS-KEY("computer aided manufacturing" OR "CAD CAM" OR sintering OR staining OR color OR shade OR sandblasting OR "airborne-particle abrasion" OR glazing OR polishing OR grinding OR aging OR fatigue OR thermocycling OR ltd OR "low temperature degradation" OR wear OR abrasion) | TS=(zirconia OR "zirconium dioxide" OR y-tzp) AND TS=(translucent OR "monolithic" OR "full anatomical" OR "full contour" OR cubic OR fsz OR 4y-tzp OR 5y-tzp) AND TS=("computer aided manufacturing" OR "CAD CAM" OR sintering OR staining OR colo\$r OR shade OR sandblasting OR "airborne-particle abrasion" OR glazing OR polishing OR grinding OR aging OR fatigue OR thermocycling OR ltd OR "low temperature degradation" OR wear OR abrasion) |
| <b>Field</b>                       | All fields                                                                                                                                                                                                                                                                                                                                                                                                                                                                                                                                                                                           | Title, abstract, keywords                                                                                                                                                                                                                                                                                                                                                                                                                                                                                                                                                                                                                                                                                                                                                                                                                                                                                                                                                                                          | Title, abstract, keywords                                                                                                                                                                                                                                                                                                                                                                                                                                                        | Topic                                                                                                                                                                                                                                                                                                                                                                                                                                                |
| <b>Language</b>                    | English                                                                                                                                                                                                                                                                                                                                                                                                                                                                                                                                                                                              | NA                                                                                                                                                                                                                                                                                                                                                                                                                                                                                                                                                                                                                                                                                                                                                                                                                                                                                                                                                                                                                 | English                                                                                                                                                                                                                                                                                                                                                                                                                                                                          | English                                                                                                                                                                                                                                                                                                                                                                                                                                              |
| <b>Year</b>                        |                                                                                                                                                                                                                                                                                                                                                                                                                                                                                                                                                                                                      |                                                                                                                                                                                                                                                                                                                                                                                                                                                                                                                                                                                                                                                                                                                                                                                                                                                                                                                                                                                                                    | 2010-2021                                                                                                                                                                                                                                                                                                                                                                                                                                                                        | 2010-2021                                                                                                                                                                                                                                                                                                                                                                                                                                            |
| <b>Type of publication, source</b> |                                                                                                                                                                                                                                                                                                                                                                                                                                                                                                                                                                                                      |                                                                                                                                                                                                                                                                                                                                                                                                                                                                                                                                                                                                                                                                                                                                                                                                                                                                                                                                                                                                                    | Article<br>Source type: Journal                                                                                                                                                                                                                                                                                                                                                                                                                                                  | Article                                                                                                                                                                                                                                                                                                                                                                                                                                              |
| <b>Type of area, categories</b>    |                                                                                                                                                                                                                                                                                                                                                                                                                                                                                                                                                                                                      |                                                                                                                                                                                                                                                                                                                                                                                                                                                                                                                                                                                                                                                                                                                                                                                                                                                                                                                                                                                                                    | Subject area: Materials Science, Dentistry, Engineering, Chemical Engineering, Chemistry, Medicine                                                                                                                                                                                                                                                                                                                                                                               | Research areas: Materials science, Dentistry oral surgery medicine, Engineering, Chemistry, Science technology other topics, Physics, Biophysics, Optics, Electrochemistry, Mechanics, Crystallography, Microscopy, Research experimental medicine                                                                                                                                                                                                   |

Exclusions

Keywords: Fuel cells, Solid oxide fuel cells  
Source title: Journal of Alloys and Compounds, Computer systems science and engineering, Carbon, Fuel, Integrated Ferroelectrics, Journal of power sources, Canadian Metallurgical Quarterly, Catalysis communications, Catalysis Today, Chinese journal of aeronautics

Web of Science categories: Dentistry oral surgery medicine, Materials science ceramics, Materials science multidisciplinary, Materials science biomaterials, Engineering biomedical, Optics

Source title: Journal of alloys and compounds, Journal of nuclear materials, Journal of power sources, Carbon, Applied clay science

Research areas: Metallurgy metallurgical engineering, Mining mineral processing, Construction building technology, Dermatology, Energy fuels

NA: Not available

Table S2. Risk of bias (quality) assessment tool.

|                  |                                                                                                                   |     |      |                     |                   |                  |
|------------------|-------------------------------------------------------------------------------------------------------------------|-----|------|---------------------|-------------------|------------------|
| Reference        |                                                                                                                   |     |      |                     |                   |                  |
| Reviewer         |                                                                                                                   |     |      |                     |                   |                  |
| Date             |                                                                                                                   |     |      |                     |                   |                  |
|                  |                                                                                                                   |     |      |                     |                   |                  |
| Domain           | Item                                                                                                              | Yes | No   | Unclear/<br>missing | Not<br>applicable | Comments/details |
| Selection bias   | Objectives:<br>Was/were the objective/-s specific?                                                                |     |      |                     |                   |                  |
|                  | Study population:<br>Were the materials clearly described?                                                        |     |      |                     |                   |                  |
|                  | Was the control group/-s relevant?                                                                                |     |      |                     |                   |                  |
|                  | Sample size:<br>Was the number of specimens included in the study<br>clearly stated?                              |     |      |                     |                   |                  |
|                  | Was it clear how the sample size was determined (for<br>example by power analysis, according to ISO<br>standard)? |     |      |                     |                   |                  |
|                  | Were all groups (within the same test method) equal in<br>sample size?                                            |     |      |                     |                   |                  |
|                  | Were the specimens randomly allocated to groups<br>and/or interventions?                                          |     |      |                     |                   |                  |
|                  | Assessment of selection bias                                                                                      | Low | High | Moderate            |                   |                  |
| Performance bias | Were the processing factors clearly described?                                                                    |     |      |                     |                   |                  |
|                  | Were the processing steps performed in a standardized<br>way?                                                     |     |      |                     |                   |                  |
|                  | Were the processing steps performed in a reproducible<br>way?                                                     |     |      |                     |                   |                  |
|                  | Where applicable, were all groups treated equally?                                                                |     |      |                     |                   |                  |

|                                  |     |      |          |  |  |
|----------------------------------|-----|------|----------|--|--|
| Were the specimens standardized? |     |      |          |  |  |
| Assessment of performance bias   | Low | High | Moderate |  |  |

|                                                         |     |      |          |  |  |
|---------------------------------------------------------|-----|------|----------|--|--|
| <b>Detection bias</b>                                   |     |      |          |  |  |
| Were the methods clearly described and reproducible?    |     |      |          |  |  |
| Were standardized methods used?                         |     |      |          |  |  |
| Were the outcomes pre-specified and defined?            |     |      |          |  |  |
| Was the statistical method suitable for the purpose?    |     |      |          |  |  |
| Were the statistical results appropriately interpreted? |     |      |          |  |  |
| Was the significance level pre-defined?                 |     |      |          |  |  |
|                                                         |     |      |          |  |  |
| Assessment of detection bias                            | Low | High | Moderate |  |  |

|                                                             |     |      |          |  |  |
|-------------------------------------------------------------|-----|------|----------|--|--|
| <b>Attrition bias</b>                                       |     |      |          |  |  |
| If specimens were excluded: was the number clearly stated?  |     |      |          |  |  |
| If specimens were excluded: was the reason clearly stated?  |     |      |          |  |  |
| Was the dropout and the reason similar between the groups?* |     |      |          |  |  |
| Was the dropout addressed appropriately?                    |     |      |          |  |  |
| Assessment of attrition bias                                | Low | High | Moderate |  |  |

|                                                                                              |  |  |  |  |  |
|----------------------------------------------------------------------------------------------|--|--|--|--|--|
| <b>Report bias</b>                                                                           |  |  |  |  |  |
| Were the results for each outcome reported and clearly described?                            |  |  |  |  |  |
| Were results for each group and the estimated size of the effect and its precision reported? |  |  |  |  |  |
| Were the results presented in a way that supported and related to the conclusion?            |  |  |  |  |  |

|                                                                                         |     |      |          |  |  |
|-----------------------------------------------------------------------------------------|-----|------|----------|--|--|
| Were potential confounding factors taken into account in the design and/or in analysis? |     |      |          |  |  |
| Were sources of potential bias and limitations of the study addressed?                  |     |      |          |  |  |
| Assessment of report bias                                                               | Low | High | Moderate |  |  |

|                                                                                                      |     |      |          |  |  |
|------------------------------------------------------------------------------------------------------|-----|------|----------|--|--|
| <b>Conflict of interest bias</b>                                                                     |     |      |          |  |  |
| Were sources of funding or other support described?                                                  |     |      |          |  |  |
| Have the authors declared that they lack financial or other interests that could affect the outcome? |     |      |          |  |  |
| Assessment of conflict of interest bias                                                              | Low | High | Moderate |  |  |

|                                           |     |      |          |  |  |
|-------------------------------------------|-----|------|----------|--|--|
| <b>Overall assessment of risk of bias</b> | Low | High | Moderate |  |  |
|-------------------------------------------|-----|------|----------|--|--|

\*If answer is No, consider if the dropout was addressed appropriately before automatically assessing the domain as High  
The alternative *unclear* is used when the information is not possible to derive from the text.  
The alternative *not applicable* is used when the question is not relevant.

| Domain                      | Low / Moderate / High |
|-----------------------------|-----------------------|
| Selection bias              |                       |
| Performance bias            |                       |
| Detection bias              |                       |
| Attrition bias              |                       |
| Report bias                 |                       |
| Conflict of interest bias   |                       |
| <b>Overall risk of bias</b> |                       |

### Criteria for assessment of domains

Low risk of bias: All applicable items are assessed to be at low risk of bias (assessed as yes), or items assessed as moderate (unclear), in a way that does not substantially lowers confidence in the result.

Moderate risk of bias: Multiple applicable items are assessed as moderate (unclear), or one as high risk (no) in a way that substantially lowers confidence in the result.

High risk of bias: At least one applicable item is assessed as high risk (no), or multiple items assessed as moderate (unclear) in a way that substantially lowers confidence in the result.

Overall risk of bias criteria

Low risk of bias: All domains are assessed to be at low risk of bias.

Moderate risk of bias: At least one domain is assessed as moderate, but no domain as high risk.

High risk of bias: At least one domain is assessed as high risk, or at least four domains as moderate.

**Table S3.** Reasons for exclusion for publications

**Reason for exclusion**

**Unclear zirconia type**

1. Alghazzawi TF, Lemons J, Liu PR, Essig ME, Bartolucci AA, Janowski GM. Influence of low-temperature environmental exposure on the mechanical properties and structural stability of dental zirconia. *J. Prosthodont.* **2012**,21(5),363-9.
2. Amaya-Pajares SP, Ritter AV, Vera Resendiz C, Henson BR, Culp L, Donovan TE. Effect of Finishing and Polishing on the Surface Roughness of Four Ceramic Materials after Occlusal Adjustment. *J. Esthet. Restor. Dent.* **2016**,28,382-396.
3. Attachoo S, Juntavee N. Role of sintered temperature and sintering time on spectral translucence of nano-crystal monolithic zirconia. *J. Clin. Exp. Dent.* **2019**,11,e146-e153.
4. Beuer F, Stimmelmayer M, Gueth JF, Edelhoff D, Naumann M. In vitro performance of full-contour zirconia single crowns. *Dent. Mater.* **2012**,28,449-56.
5. Choi JW, Bae IH, Noh TH, Ju SW, Lee TK, Ahn JS, et al. Wear of primary teeth caused by opposed all-ceramic or stainless steel crowns. *J. Adv. Prosthodont.* **2016**,8,43-52.
6. Chougule KJ, Wadkar AP. An In vitro Comparative Evaluation of Flexural Strength of Monolithic Zirconia after Surface Alteration Utilising Two Different Techniques. *J. Clin. Diagn. Res.* **2017**,11,ZC20-ZC23.
7. Cui X, Shen Z, Wang X. Esthetic appearances of anatomic contour zirconia crowns made by additive wet deposition and subtractive dry milling, A self-controlled clinical trial. *J. Prosthet. Dent.* **2020**,123,442-448.
8. Ebeid K, Wille S, Hamdy A, Salah T, El-Etreby A, Kern M. Effect of changes in sintering parameters on monolithic translucent zirconia. *Dent. Mater.* **2014**,30,e419-24.
9. Bandeira MB, Queiroz IMS, Fernandes SKSC, Freitas A, Özcan M, Martinelli AE, Queiroz JRC. Evaluation of surface roughness of monolithic zirconia after using different polishing kits. *Pesqui. Bras. Odontopediatria Clin. Integr.* **2017**,17(1),e2984.
10. Giti R, Hojati SA. Effect of Varying Thickness and Number of Coloring Liquid Applications on the Color of Anatomic Contour Monolithic Zirconia Ceramics. *J. Dent. (Shiraz).* **2018**,19,311-319.
11. Gwon B, Bae EB, Lee JJ, Cho WT, Bae HY, Choi JW, et al. Wear Characteristics of Dental Ceramic CAD/CAM Materials Opposing Various Dental Composite Resins. *Materials (Basel).* **2019**,12,1839.
12. Hartkamp O, Lohbauer U, Reich S. Antagonist wear by polished zirconia crowns. *Int. J. Comput. Dent.* **2017**,20(3),263-274.
13. Jang YS, Nguyen TDT, Ko YH, Lee DW, Baik BJ, Lee MH, et al. In vitro wear behavior between enamel cusp and three aesthetic restorative materials, Zirconia, porcelain, and composite resin. *J. Adv. Prosthodont.* **2019**,11,7-15.
14. Jin S, Choi JW, Jeong CM, Huh JB, Lee SH, Lee H, et al. Evaluating the Wear of Resin Teeth by Different Opposing Restorative Materials. *Materials (Basel).* **2019**,12,3684.
15. Kelesi M, Kontonasaki E, Kantiranis N, Papadopoulou L, Zorba T, Paraskevopoulos KM, et al. The effect of different aging protocols on the flexural strength and phase transformations of two monolithic zirconia ceramics. *J. Appl. Biomater. Funct. Mater.* **2020**,18,2280800020982677.
16. Kim HK, Kim SH. Effect of the number of coloring liquid applications on the optical properties of monolithic zirconia. *Dent. Mater.* **2014**,30,e229-37.
17. Kim HK, Kim SH. Comparison of the optical properties of pre-colored dental monolithic zirconia ceramics sintered in a conventional furnace versus a microwave oven. *J. Adv. Prosthodont.* **2017**,9,394-401.
18. Kim HK, Kim SH, Lee JB, Ha SR. Effects of surface treatments on the translucency, opalescence, and surface texture of dental monolithic zirconia ceramics. *J. Prosthet. Dent.* **2016**,115,773-9.

19. Kim HK, Kim SH, Lee JB, Han JS, Yeo IS. Effect of polishing and glazing on the color and spectral distribution of monolithic zirconia. *J. Adv. Prosthodont.* **2013**,5,296-304.
20. Kim HK, Kim SH, Lee JB, Han JS, Yeo IS, Ha SR. Effect of the amount of thickness reduction on color and translucency of dental monolithic zirconia ceramics. *J. Adv. Prosthodont.* **2016**,8,37-42.
21. Kim SH, Choi YS. Changes in properties of monolithic and conventional zirconia during aging process. *Mech. Mater.* **2019**,138 103159.
22. Lameira DP, Buarque e Silva WA, Andrade e Silva F, De Souza GM. Fracture Strength of Aged Monolithic and Bilayer Zirconia-Based Crowns. *Biomed. Res. Int.* **2015**,2015,418641.
23. Lee WF, Feng SW, Lu YJ, Wu HJ, Peng PW. Effects of two surface finishes on the color of cemented and colored anatomic-contour zirconia crowns. *J. Prosthet. Dent.* **2016**,116,264-8.
24. Guilardi LF, Soares P, Werner A, de Jager N, Pereira GKR, Kleverlaan CJ, Rippe MP, Valandro LF. Fatigue performance of distinct CAD/CAM dental ceramics. *J. Mech. Behav. Biomed. Mater.* **2020**,103,103540.
25. Luanguangrong P, Cook NB, Sabrah AH, Hara AT, Bottino MC. Influence of full-contour zirconia surface roughness on wear of glass-ceramics. *J. Prosthodont.* **2014**,23,198-205.
26. Mohammadi-Bassir M, Babasafari M, Rezvani MB, Jamshidian M. Effect of coarse grinding, overglazing, and 2 polishing systems on the flexural strength, surface roughness, and phase transformation of yttrium-stabilized tetragonal zirconia. *J. Prosthet. Dent.* **2017**,118,658-665.
27. Nam JY, Park MG. Effects of aqueous and acid-based coloring liquids on the hardness of zirconia restorations. *J. Prosthet. Dent.* **2017**,117,662-668.
28. Nam JY, Park MG. Effects of treatment with aqueous and acid-based coloring liquid on the color of zirconia. *J. Prosthet. Dent.* **2019**,121,363.e1-363.e5.
29. Tao Y, Cui X, Zhang D, Shen Z, Tong D, Wang X. The application potential of self-glazed zirconia crowns confirmed by easy grinding and polishing of the enamel-like surface. *Adv. Appl. Ceram.* **2020**,119,297-304.
30. Yin R, Lee MH, Bae TS, Song KY. Effect of finishing condition on fracture strength of monolithic zirconia crowns. *Dent. Mater. J.* **2019**,38,203-210.
31. Zhang YD, Han JM, Zheng G, Lin H, Bai W, Zhao J, et al. Fatigue behaviours of the zirconia dental restorations prepared by two manufacturing methods. *Adv. Appl. Ceram.* **2017**,116,368-75.
32. Ban S ST, Yoshihara K, Takeuchi M, Kawai T, Murakami H, Kono H. Surface properties of dental zirconia after clinical grinding and polishing. *Key Eng. Mater.* **2013**,529,501-6.
33. Elshiyab SH, Nawafleh N, Walsh L, George R. Fracture resistance and survival of implant-supported, zirconia-based hybrid-abutment crowns, Influence of aging and crown structure. *J. Investig. Clin. Dent.* **2018**,9,e12355
34. Elshiyab SH, Nawafleh N, Öchsner A, George R. Fracture resistance of implant- supported monolithic crowns cemented to zirconia hybrid-abutments, zirconia-based crowns vs. lithium disilicate crowns. *J. Adv. Prosthodont.* **2018**,10,65-72.
35. Giti R, Haghdooost S, Ansarifard E. Effect of different coloring techniques and surface treatment methods on the surface roughness of monolithic zirconia. *Dent. Res. J. (Isfahan).* **2020**,17,152-161.
36. Kontos L, Schille C, Schweizer E, Geis-Gerstorfer J. Influence of surface treatment on the wear of solid zirconia. *Acta. Odontol. Scand.* **2013**,71,482-7.
37. Sabrah AH, Cook NB, Luanguangrong P, Hara AT, Bottino MC. Full-contour Y-TZP ceramic surface roughness effect on synthetic hydroxyapatite wear. *Dent. Mater.* **2013**,29,666-73.
38. Scherrer D, Bragger U, Ferreri M, Mocker A, Joda T. In-vitro polishing of CAD/CAM ceramic restorations: An evaluation with SEM and confocal profilometry. *J. Mech. Behav. Biomed. Mater.* **2020**,107,103761.

39. Soult MD, Lien W, Savett DA, Gallardo FF, Vandewalle KS. Effect of high-speed sintering on the properties of a zirconia material. *Gen. Dent.* **2019**,67,30-34.

**Not high translucent zirconia**

1. Tuncel I, Turp I, Usumez A. Effect of color shading procedures and cyclic loading on the biaxial flexural strength of zirconia. *Niger J Clin. Pract.* **2018**,21,7-12.
2. Alonso J, Rodriguez-Rojas F, Borrero-Lopez O, Ortiz AL, Guiberteau F. Effect of sintering duration on the sliding-wear resistance of 3Y-TZP dental ceramics. *Int. J. Appl. Ceram. Technol.* **2019**,16,1954-1961.
3. Alves LMM, Contreras LPC, Bueno MG, Campos TMB, Bresciani E, Valera MC, et al. The Wear Performance of Glazed and Polished Full Contour Zirconia. *Braz. Dent. J.* **2019**,30,511-8.
4. Amaral M, Villefort RF, Melo RM, Pereira GKR, Zhang Y, Val, et al. Fatigue limit of monolithic Y-TZP three-unit-fixed dental prostheses: Effect of grinding at the gingival zone of the connector. *J. Mech. Behav. Biomed. Mater.* **2017**,72,159-162.
5. Ângela Maziero Volpato C, Francisco Cesar P, Antônio Bottino M. Influence of Accelerated Aging on the Color Stability of Dental Zirconia. *J. Esthet. Restor. Dent.* **2016**,28,304-312.
6. Ban S, Okuda Y, Noda M, Tsuruki J, Kawai T, Kono H. Contamination of dental zirconia before final firing: effects on mechanical properties. *Dent. Mater. J.* **2013**,32,1011-9.
7. Coşkun ME, Çelenk F. Structural alterations of zirconia depending on sintering parameters and effects on bond strength after different surface treatments. *Cumhuriyet Dent J.* **2019**,22,402-11.
8. Denry I, Abdelaal M, Dawson DV, Holloway JA, Kelly JR. Effect of crystalline phase assemblage on reliability of 3Y-TZP. *J. Prosthet. Dent.* **2021**,126,238-247.
9. Denkena B, Breidenstein B, Busemann S, Lehr CM. Impact of hard machining on zirconia based ceramics for dental applications. In: Shih A, Cao J, editors. 3rd Cirp Conference on Biomanufacturing. Procedia CIRP. 652017. **2017**,65,248-252.\*
10. Fiorin L, Moris ICM, Faria ACL, Ribeiro RF, Rodrigues RCS. Effect of different grinding protocols on surface characteristics and fatigue behavior of yttria-stabilized zirconia polycrystalline: An in vitro study. *J. Prosthet. Dent.* **2020** Oct,124(4),486.e1-486.e8.
11. Guess PC, Zhang Y, Kim JW, Rekow ED, Thompson VP. Damage and reliability of Y-TZP after cementation surface treatment. *J. Dent. Res.* **2010**,89,592-6.
12. Hajhamid B, Mohammad Rahimi R, F Bahr D, M De Souza G. Effect of ionizing radiation and chewing simulation on human enamel and zirconia. *J. Prosthodont. Res.* **2021** 24,65,67-72.
13. Hmaidouch R, Müller WD, Lauer HC, Weigl P. Surface roughness of zirconia for full-contour crowns after clinically simulated grinding and polishing. *Int. J. Oral Sci.* **2014**,6,241-6.
14. Ilie N, Stawarczyk B. Quantification of the amount of light passing through zirconia: the effect of material shade, thickness, and curing conditions. *J. Dent.* **2014**,42,684-90.
15. Inokoshi M, Zhang F, De Munck J, Minakuchi S, Naert I, Vleugels J, et al. Influence of sintering conditions on low-temperature degradation of dental zirconia. *Dent. Mater.* **2014**,30,669-78.
16. Jiang L, Liao Y, Wan Q, Li W. Effects of sintering temperature and particle size on the translucency of zirconium dioxide dental ceramic. *J. Mater. Sci. Mater. Med.* **2011**,22,2429-35.
17. Kim MJ, Ahn JS, Kim JH, Kim HY, Kim WC. Effects of the sintering conditions of dental zirconia ceramics on the grain size and translucency. *J. Adv. Prosthodont.* **2013**,5,161-6.
18. Lee KH, Nam KW. A study on the wear characteristics of ZrO<sub>2</sub> monoliths and ZrO<sub>2</sub>/SiC composites. *J Ceram Process Res.* **2018**,19,54-64.

19. Mota YA, Cotes C, Carvalho RF, Machado JPB, Leite FPP, Souza ROA, et al. Monoclinic phase transformation and mechanical durability of zirconia ceramic after fatigue and autoclave aging. *J. Biomed. Mater. Res. B Appl. Biomater.* **2017**,105,1972-1977.
20. Papageorgiou-Kyran A, Kokoti M, Kontonasaki E, Koidis P. Evaluation of color stability of preshaded and liquid-shaded monolithic zirconia. *J. Prosthet. Dent.* **2018**,119,467-472.
21. Pecho OE, Ghinea R, Ionescu AM, Cardona Jde L, Paravina RD, Pérez Mdel M. Color and translucency of zirconia ceramics, human dentine and bovine dentine. *J. Dent.* **2012**,40 Suppl 2,e34-40.
22. Pittayachawan P, McDonald A, Young A, Knowles JC. Flexural strength, fatigue life, and stress-induced phase transformation study of Y-TZP dental ceramic. *J. Biomed. Mater. Res. B Appl. Biomater.* **2009** Feb,88(2),366-77.
23. Lobo CMM, Sacorague S, Silva NRD, Costa AKF, Alves LMM, Bottino MA, et al. Effect of glazing application side and mechanical cycling on the biaxial flexural strength and Weibull characteristics of a Y-TZP ceramic. *J. Appl. Oral Sci.* **2020**,28,e20200438.
24. Rohr N, Balmer M, Müller JA, Martin S, Fischer J. Chewing simulation of zirconia implant supported restorations. *J. Prosthodont. Res.* **2019**,63,361-367.
25. Ryan DPO, Fais LMG, Antonio SG, Hatanaka GR, Ido LM, Pinelli LAP. Y-TZP zirconia regeneration firing: Microstructural and crystallographic changes after grinding. *Dent. Mater. J.* **2017**,36,447-453.
26. Solá-Ruiz MF, Baixauli-López M, Roig-Vanaclocha A, Amengual-Lorenzo J, Agustín-Panadero R. Prospective study of monolithic zirconia crowns: clinical behavior and survival rate at a 5-year follow-up. *J. Prosthodont. Res.* **2021**,65,284-290.
27. Somacal DC, Dreyer JW, Danesi P, Spohr AM. Surface roughness of monolithic zirconia ceramic submitted to different polishing systems. *Braz. J. Oral Sci.* **2019**,18,1-9.
28. Janyavula S, Lawson N, Cakir D, Beck P, Ramp LC, Burgess JO. The wear of polished and glazed zirconia against enamel. *J. Prosthet. Dent.* **2013**,109,22-9.\*
29. Burgess JO, Janyavula S, Lawson NC, Lucas TJ, Cakir D. Enamel Wear Opposing Polished and Aged Zirconia. *Oper. Dent.* **2014**,39,189-94.\*
30. Chong BJ, Thangavel AK, Rolton SB, Guazzato M, Klineberg IJ. Clinical and laboratory surface finishing procedures for zirconia on opposing human enamel wear: A laboratory study. *J. Mech. Behav. Biomed. Mater.* **2015**,50,93-103.\*
31. Mitov G, Anastassova-Yoshida Y, Nothdurft FP, von See C, Pospiech P. Influence of the preparation design and artificial aging on the fracture resistance of monolithic zirconia crowns. *J. Adv. Prosthodont.* **2016**,8,30-6.
32. Nakamura K, Harada A, Ono M, Shibasaki H, Kanno T, Niwano Y, et al. Effect of low-temperature degradation on the mechanical and microstructural properties of tooth-colored 3Y-TZP ceramics. *J. Mech. Behav. Biomed. Mater.* **2016**,53,301-311.\*

#### Experimental method

1. Amat NF, Muchtar A, Amril MS, Ghazali MJ, Yahaya N. Effect of sintering temperature on the aging resistance and mechanical properties of monolithic zirconia. *J. Mater. Res. Technol.* **2019**,8,1092-101.
2. Ban S, Suehiro Y, Nakanishi H, Nawa M. Fracture toughness of dental zirconia before and after autoclaving. *J. Ceram. Soc. Jpn.* **2010**,118,406-9.\*
3. Borges MAP, Alves MR, dos Santos HES, dos Anjos MJ, Elias CN. Oral degradation of Y-TZP ceramics. *Ceram Int.* **2019**,45,9955-61.
4. Cha MS, Huh YH, Cho LR, Park CJ. A comparative study of the wear of dental alloys against monolithic zirconia. *J. Prosthet. Dent.* **2020**,123,866-873.

5. Cotič J, Kocjan A, Panchevska S, Kosmač T, Jevnikar P. In vivo ageing of zirconia dental ceramics - Part II: Highly-translucent and rapid-sintered 3Y-TZP. *Dent. Mater.* **2021**,37,454-463.
6. Darmawan BA, Fisher JG, Trung DT, Sakthiabirami K, Park SW. Two-Step Sintering of Partially Stabilized Zirconia for Applications in Ceramic Crowns. *Materials (Basel)*. **2020**,13,1857.
7. dos Santos C, Rosa GO, Quintino MN, Rodrigues Pais Alves MF, Ribeiro S, Luis Melo-Silva C. Effect of surface finishing and thickness on the translucency of zirconia dental ceramics. *Ceram. Int.* **2020**,46,7748-55.
8. Fonseca YR, Elias CN, Monteiro SN, Santos H, Santos CD. Modeling of the Influence of Chemical Composition, Sintering Temperature, Density, and Thickness in the Light Transmittance of Four Zirconia Dental Prostheses. *Materials (Basel)*. **2019**,12,2529.
9. Hara M, Takuma Y, Sato T, Koyama T, Yoshinari M. Wear performance of bovine tooth enamel against translucent tetragonal zirconia polycrystals after different surface treatments. *Dent. Mater. J.* **2014**,33,811-7.
10. Hayashi S, Homma S, Takanashi T, Hirano T, Yoshinari M, Yajima Y. Wear properties of esthetic dental materials against translucent zirconia. *Dent. Mater. J.* **2019**,38,250-256.
11. Kaizer MR, Bano S, Borba M, Garg V, Dos Santos MBF, Zhang Y. Wear Behavior of Graded Glass/Zirconia Crowns and Their Antagonists. *J. Dent. Res.* **2019**,98,437-442.
12. Liu Y, Wang Y, Wang D, Ma J, Liu L, Shen Z. Self-glazed zirconia reducing the wear to tooth enamel. *J. Eur. Ceram. Soc.* **2016**,36,2889-94.
13. Mao L, Kaizer MR, Zhao M, Guo B, Song YF, Zhang Y. Graded Ultra-Translucent Zirconia (5Y-PSZ) for Strength and Functionalities. *J. Dent. Res.* **2018**,97,1222-1228.
14. Wei C, Gremillard L. The influence of stresses on ageing kinetics of 3Y- and 4Y- stabilized zirconia. *J. Eur. Ceram. Soc.* **2018**,38,753-60.
15. Zhang F, Reveron H, Spies BC, Van Meerbeek B, Chevalier J. Trade-off between fracture resistance and translucency of zirconia and lithium-disilicate glass ceramics for monolithic restorations. *Acta Biomater.* **2019**,91,24-34.
16. Zhang F, Spies BC, Vleugels J, Reveron H, Wesemann C, Müller WD, et al. High-translucent yttria-stabilized zirconia ceramics are wear-resistant and antagonist-friendly. *Dent. Mater.* **2019**,35,1776-1790.
17. Zhang F, Van Meerbeek B, Vleugels J. Importance of tetragonal phase in high-translucent partially stabilized zirconia for dental restorations. *Dent. Mater.* **2020**,36,491-500.

#### **Irrelevant processing factor or intervention**

1. Alp G, Subaşı MG, Seghi RR, Johnston WM, Yilmaz B. Effect of shading technique and thickness on color stability and translucency of new generation translucent zirconia. *J. Dent.* **2018**,73,19-23.
2. Alshali SA, Kazim SA, Nageeb R, Almarshoud HS. Comparative Evaluation of the Translucency of Monolithic Zirconia. *J. Contemp. Dent. Pract.* **2020**,21,51-55.
3. Al-Zordk W, Saker S. Impact of sintering procedure and clinical adjustment on color stability and translucency of translucent zirconia. *J. Prosthet. Dent.* **2020**,124,788.e1-788.e9.
4. Bittar BF, Mir, a JS, Simões AC, de Carvalho Ramos N, Machado JPB, et al. Effect of extrinsic pigmentation and surface treatments on biaxial flexure strength after cyclic loading of a translucent ZrO(2) ceramic. *Dent. Mater.* **2019**,35,1644-1653.
5. Earar K, Grigoriu R, Scutariu MM, Vasile E, Antoniac A, Dragomir L, et al. Effect of the sandblasting process on the surface properties of dental zirconia. *Rev. Chim.* **2017**,68,1560-4.
6. Inokoshi M, Shimizu H, Nozaki K, Takagaki T, Yoshihara K, Nagaoka N, et al. Crystallographic and morphological analysis of sandblasted highly translucent dental zirconia. *Dent. Mater.* **2018**,34,508-518.

7. Inokoshi M, Shimizubata M, Nozaki K, Takagaki T, Yoshihara K, Minakuchi S, et al. Impact of sandblasting on the flexural strength of highly translucent zirconia. *J. Mech. Behav. Biomed. Mater.* **2021**,115,104268.
8. Karlens C, Schriwer C, Øilo M. Damage tolerance of six dental zirconias with different translucencies. *Biomater. Investig. Dent.* **2020**,7,126-133.
9. Kurt M, Turhan Bal B. Effects of accelerated artificial aging on the translucency and color stability of monolithic ceramics with different surface treatments. *J. Prosthet. Dent.* **2019**,121,712.e1-712.e8.
10. Kurtulmus-Yilmaz S, Önöral Ö, Aktore H, Ozan O. Does the application of surface treatments in different sintering stages affect flexural strength and optical properties of zirconia? *J. Esthet. Restor. Dent.* **2020**,32,81-90.
11. Mahmood DJH, Braian M, Khan AS, Shabaz A, Larsson C. Fracture load of colored and non-colored high translucent zirconia three-unit fixed dental prosthesis frameworks. *Acta Biomater. Odontol. Scand.* **2018**,4,38-43.
12. Manziuc MM, Gasparik C, Burde AV, Dudea D. Color and masking properties of translucent monolithic zirconia before and after glazing. *J. Prosthodont. Res.* **2021**,65,303-310.
13. Maruo Y, Yoshihara K, Irie M, Nishigawa G, Nagaoka N, Matsumoto T, et al. Flexural properties, bond ability, and crystallographic phase of highly translucent multi-layered zirconia. *J. Appl. Biomater. Funct. Mater.* **2020**,18,2280800020942717.
14. Mešić K, Majnarić I, Obhodaš J, Baršić G, Mehulić K. The Effect of Aging on Composition and Surface of Translucent Zirconia Ceramic. *Acta Stomatol. Croat.* **2021**,54,339-52.
15. Monaco C, Arena A, Scheda L, Di Fiore A, Zucchelli G. In vitro 2D and 3D roughness and spectrophotometric and gloss analyses of ceramic materials after polishing with different prophylactic pastes. *J. Prosthet. Dent.* **2020**,124,787.e1-787.e8.
16. Saker S, Özcan M. Effect of surface finishing and polishing procedures on color properties and translucency of monolithic zirconia restorations at varying thickness. *J. Esthet. Restor. Dent.* **2021**,33,953-963.
17. Zucuni CP, Venturini AB, Prochnow C, Rocha Pereira GK, Val, ro LF. Load-bearing capacity under fatigue and survival rates of adhesively cemented yttrium-stabilized zirconia polycrystal monolithic simplified restorations. *J. Mech. Behav. Biomed. Mater.* **2019**,90,673-680.

#### **Not monolithic specimens**

1. Cardelli P, Manobianco FP, Serafini N, Murmura G, Beuer F. Full-Arch, Implant-Supported Monolithic Zirconia Rehabilitations: Pilot Clinical Evaluation of Wear Against Natural or Composite Teeth. *J. Prosthodont.* **2016**,25,629-633.
2. Dikicier S, Ayyildiz S, Ozen J, Sipahi C. Effect of varying core thicknesses and artificial aging on the color difference of different all-ceramic materials. *Acta Odontol. Scand.* **2014**,72,623-9.
3. Guncu MB, Cakan U, Muhtarogullari M, Canay S. Zirconia-Based Crowns Up to 5 Years in Function: A Retrospective Clinical Study and Evaluation of Prosthetic Restorations and Failures. *Int J. Prosthodont.* **2015**,28,152-7.\*
4. Monaco C, Caldari M, Scotti R, Agnini A, Barazzutti F, Bianchessi C, et al. Clinical Evaluation of Zirconia-Based Restorations on Implants: A Retrospective Cohort Study from the AIOP Clinical Research Group. *Int. J. Prosthodont.* **2015**,28,239-42.\*

#### **Irrelevant outcome or required data missing**

1. Box VH, Sukotjo C, Knoernschild KL, Campbell SD, Afshari FS. Patient-Reported and Clinical Outcomes of Implant-Supported Fixed Complete Dental Prostheses: A Comparison of Metal-Acrylic, Milled Zirconia, and Retrievable Crown Prostheses. *J. Oral Implantol.* **2018**,44,51-61.
2. Lohbauer U, Reich S. Antagonist wear of monolithic zirconia crowns after 2 years. *Clin Oral Investig.* **2017** May,21(4),1165-1172.

3. Miura S, Yamauchi S, Kasahara S, Katsuda Y, Fujisawa M, Egusa H. Clinical evaluation of monolithic zirconia crowns: a failure analysis of clinically obtained cases from a 3.5-year study. *J. Prosthodont. Res.* **2021**,65,148-154.
4. Nakonieczny DS, Sambok A, Antonowicz M, Basiaga M, Paszenda ZK, Krawczyk C, et al. Ageing of Zirconia Dedicated to Dental Prostheses for Bruxers Part 2: Influence of Heat Treatment for Surface Morphology, Phase Composition and Mechanical Properties. *Rev. Adv. Mater. Sci.* **2019**,58,218-225.

#### **No control**

1. Alves DM, Cadore-Rodrigues AC, Prochnow C, Burgo TAL, Spazzin AO, Bacchi A, et al. Fatigue performance of adhesively luted glass or polycrystalline CAD-CAM monolithic crowns. *J. Prosthet. Dent.* **2021**,126,119-127.
2. Amelya A, Kim JE, Woo CW, Otgonbold J, Lee KW. Load-Bearing Capacity of Posterior CAD/CAM Implant-Supported Fixed Partial Dentures Fabricated with Different Esthetic Materials. *Int. J. Prosthodont.* **2019**,32,201-204.
3. Habib SR, Ansari AS, Alqahtani M, Alshiddi IF, Alqahtani AS, Hassan SH. Analysis of enamel and material wear by digital microscope: an in-vitro study. *Braz. Oral Res.* **2020**,33,e121.

#### **No objective method**

1. Donly KJ, Méndez MJC, Contreras CI, Liu JA. Prospective randomized clinical trial of primary molar crowns: 36-month results. *Am. J. Dent.* **2020**,33,165-168.
2. Pontevedra P, Lopez-Suarez C, Pelaez J, Garcia-Serdio S, Suarez MJ. Prospective Clinical Evaluation of Posterior Monolithic Zirconia Fixed Partial Dentures Using a Complete Digital Workflow: Two-Year Follow-Up. *J. Prosthodont.* **2021**,30,298-304.

#### **Irrelevant study design**

1. Koenig V, Wulfman CP, Derbanne MA, Dupont NM, Le Goff SO, Tang ML, et al. Aging of monolithic zirconia dental prostheses: Protocol for a 5-year prospective clinical study using ex vivo analyses. *Contemp. Clin. Trials. Commun.* **2016**,4,25-32.

#### **Not English**

1. Ji-De W, Jiu-Peng D, Bao-Lian S, Li-Juan M. Effects of three surface roughening treatments on adhesion and flexural strength of zirconia ceramics: which one is better? *Chin. J. Tissue Eng. Res.* **2018**,22,4196-201.

#### **Insufficient quality and data**

1. Abed IJ, Bassim D. Manufacturing of zirconia ceramics for dental applications by computer aided design and manufacturing (CAD/CAM). *J. Eng. Appl. Sci.* **2018**,13,9868-9879.

\*References from the manual search of reference lists of reviews
